# Supplementary material for: Biochemical screening for SARS-CoV-2 main protease inhibitors
Source: PLoS One. 2020 Oct 6;15(10):e0240079. doi: 10.1371/journal.pone.0240079 (PMC7537881; doi:10.1371/journal.pone.0240079)

# Biochemical screening for SARS-CoV-2 main protease inhibitors

Camila Coelho<sup>1\*</sup>, Gloria Gallo<sup>1\*</sup>, Claudia B. Campos<sup>1</sup>, Leon Hardy<sup>2</sup>, Martin Würtele<sup>1\*\*</sup>

<sup>1</sup>Department of Science and Technology, Federal University of São Paulo, São José dos Campos, Brazil. <sup>2</sup>Department of Physics, University of South Florida, Tampa, United States of America. \*These authors contributed equally to this work. \*\*Corresponding author.

## Supporting Information

**S1 Table. Kinetics of SARS-Cov-2 M<sup>pro</sup> inhibitors.** IC<sub>50</sub>, inhibitory (dissociation) constants (K<sub>i</sub>), Michaelis Menten constants (K<sub>m</sub>), turnover numbers (k<sub>cat</sub>), and different kinetic model candidates (together with acceptance criteria values) of SARS-Cov-2 M<sup>pro</sup> inhibitors are given.

| Compound                                            | IC <sub>50</sub><br>(μM)* | K <sub>i</sub><br>(μM)* | K <sub>m</sub><br>(μM)* | k <sub>cat</sub><br>(s <sup>-1</sup> )* | Inhibition<br>mechanism** | SSQ <sup>§</sup> | ΔAIC <sup>&amp;</sup> | ΔBIC <sup>#</sup> |
|-----------------------------------------------------|---------------------------|-------------------------|-------------------------|-----------------------------------------|---------------------------|------------------|-----------------------|-------------------|
| Thimerosal (1)                                      | 0.6 ± 0.1                 | 0.6 ± 0.2               | 47 ± 8                  | 0.010 ± 0.0011                          | <b>Mixed</b>              | 1                | 0                     | 0                 |
|                                                     |                           |                         |                         |                                         | non-competitive           | 1.4              | 2.4                   | 1.5               |
| Phenylmercuric acetate (2)                          | 0.4 ± 0.06                | 0.11 ± 0.03             | 52 ± 19                 | 0.013 ± 0.0024                          | <b>Competitive</b>        | 1                | 0                     | 0                 |
|                                                     |                           |                         |                         |                                         | non-competitive           | 1.1              | 2.0                   | 2.0               |
| Bronopol (3)                                        | 4.4 ± 0.6                 | 2.5 ± 0.3               | 45 ± 9                  | 0.010 ± 0.0013                          | <b>non-competitive</b>    | 1                | 0                     | 0                 |
|                                                     |                           |                         |                         |                                         | mixed                     | 1                | 3.0                   | 3.9               |
| Tannic acid (4)                                     | 2.1 ± 0.2                 | 1.4 ± 0.14              | 47 ± 8                  | 0.010 ± 0.0011                          | <b>Competitive</b>        | 1                | 0                     | 0                 |
|                                                     |                           |                         |                         |                                         | non-competitive           | 1.2              | 4.1                   | 4.1               |
| Hematoporphyrin (5)                                 | 3.9 ± 0.6                 | 5.9 ± 0.5               | 50 ± 8                  | 0.011 ± 0.0011                          | <b>non-competitive</b>    | 1                | 0                     | 0                 |
|                                                     |                           |                         |                         |                                         | mixed                     | 1                | 3.0                   | 4.2               |
|                                                     |                           |                         |                         |                                         | competitive               | 1.2              | 3.2                   | 3.2               |
| 3,4-Didesmethyl-5-deshydroxy-3'-ethoxyscleroiin (6) | 10.6 ± 1.3                | 5.6 ± 0.5               | 51 ± 10                 | 0.011 ± 0.0014                          | <b>non-competitive</b>    | 1                | 0                     | 0                 |
|                                                     |                           |                         |                         |                                         | competitive               | 1.1              | 2.1                   | 2.1               |
|                                                     |                           |                         |                         |                                         | mixed                     | 1                | 3.3                   | 4.4               |
| Evans blue (11)                                     | 0.2 ± 0.06                | 0.21 ± 0.022            | 56 ± 8                  | 0.010 ± 0.0008                          | <b>Competitive</b>        | 1                | 0                     | 0                 |
|                                                     |                           |                         |                         |                                         |                           |                  |                       |                   |
| Chicago Sky Blue (12)                               | 7.7 ± 1.6                 | 1.3 ± 0.2               | 56 ± 12                 | 0.013 ± 0.0015                          | <b>Competitive</b>        | 1                | 0                     | 0                 |
|                                                     |                           |                         |                         |                                         | noncompetitive            | 1.2              | 3.2                   | 3.2               |
|                                                     |                           |                         |                         |                                         | mixed                     | 1                | 3.4                   | 4.4               |

\*Error values are expressed as standard error of the mean (SEM).

\*\*Most probable mechanism according to SSQ, ΔAIC and ΔBIC analyses in bold.

<sup>§</sup>Summed squared deviation.

<sup>&</sup>Second order Akeike information criterion.

<sup>#</sup>Bayesian information criterion.

**S2 Table. Toxicity of SARS-Cov-2 M<sup>Pro</sup> inhibitors.**

| <b>Compound</b>                                           | <b>LD<sub>50</sub>*</b> | <b>Source</b>                                                                                                               |
|-----------------------------------------------------------|-------------------------|-----------------------------------------------------------------------------------------------------------------------------|
| <b>Thimerosal (1)</b>                                     | 75 mg/kg (oral, rat)    | Pesticide Chemicals Official Compendium, Association of the American Pesticide Control Officials, Inc., 1966, (1130), 1966. |
| <b>Phenylmercuric acetate (2)</b>                         | 41 mg/kg (oral, rat)    | Acute Toxicity Data. Journal of the American College of Toxicology, Part B., 1(175), 1992.                                  |
| <b>Bronopol (3)</b>                                       | 180 mg/kg               | Pesticide Index, Frear, E.H., ed., State College, PA, College Science Pub., 1969, 5(30), 1976.                              |
| <b>Tannic acid (4)</b>                                    | No data available       |                                                                                                                             |
| <b>Hematoporphyrin (5)</b>                                | 307 mg/kg (IV, mouse)   | Nippon Yakurigaku Zasshi. Japanese Journal of Pharmacology., 57(219), 1961.                                                 |
| <b>3,4-Didesmethyl-5-deshydroxy-3'-ethoxyscleroin (6)</b> | No data available       |                                                                                                                             |
| <b>2,3,4-Trihydroxy-4'-ethoxybenzophenone (7)</b>         | No data available       |                                                                                                                             |
| <b>Chloranil (8)</b>                                      | 4 g/kg (oral, rat)      | Pesticide Chemicals Official Compendium, Association of the American Pesticide Control Officials, Inc., 1966, (218), 1966.  |
| <b>Plumbagin (9)</b>                                      | 16 mg/kg (oral, mouse)  | Indian Journal of Experimental Biology, 18(876), 1980. [PMID:7461745]                                                       |
| <b>Vanitiolide (10)</b>                                   | No data available       |                                                                                                                             |
| <b>Evans blue (11)</b>                                    | 340 mg/kg (IP, mouse)   | Biochemical and Biophysical Research Communications., 136(64), 1986. [PMID:3010977].                                        |
| <b>Chicago Sky Blue (12)</b>                              | 2260 mg/kg(IV, mouse)   | Science, 114(41), 1951. [PMID:14854894]                                                                                     |

\* LD<sub>50</sub> – median lethal dose, as reported in [www.pubchem.gov](http://www.pubchem.gov)

**S1 Figure: Inhibition kinetics of SARS-Cov-2 M<sup>pro</sup> inhibitors.** Enzyme kinetics experiments of selected inhibitory compounds were performed with the MCA-AVLQSGFR-K(Dnp)-K-NH<sub>2</sub> fluorescent peptide as substrate (S) and using 0.5  $\mu$ M of recombinant M<sup>pro</sup> and the shown inhibitor concentrations (given in  $\mu$ M). Fluorescence values were converted using a calibration curve with MCA to molar values and corrected for IFE (internal filter effect) to obtain enzymatic rates.

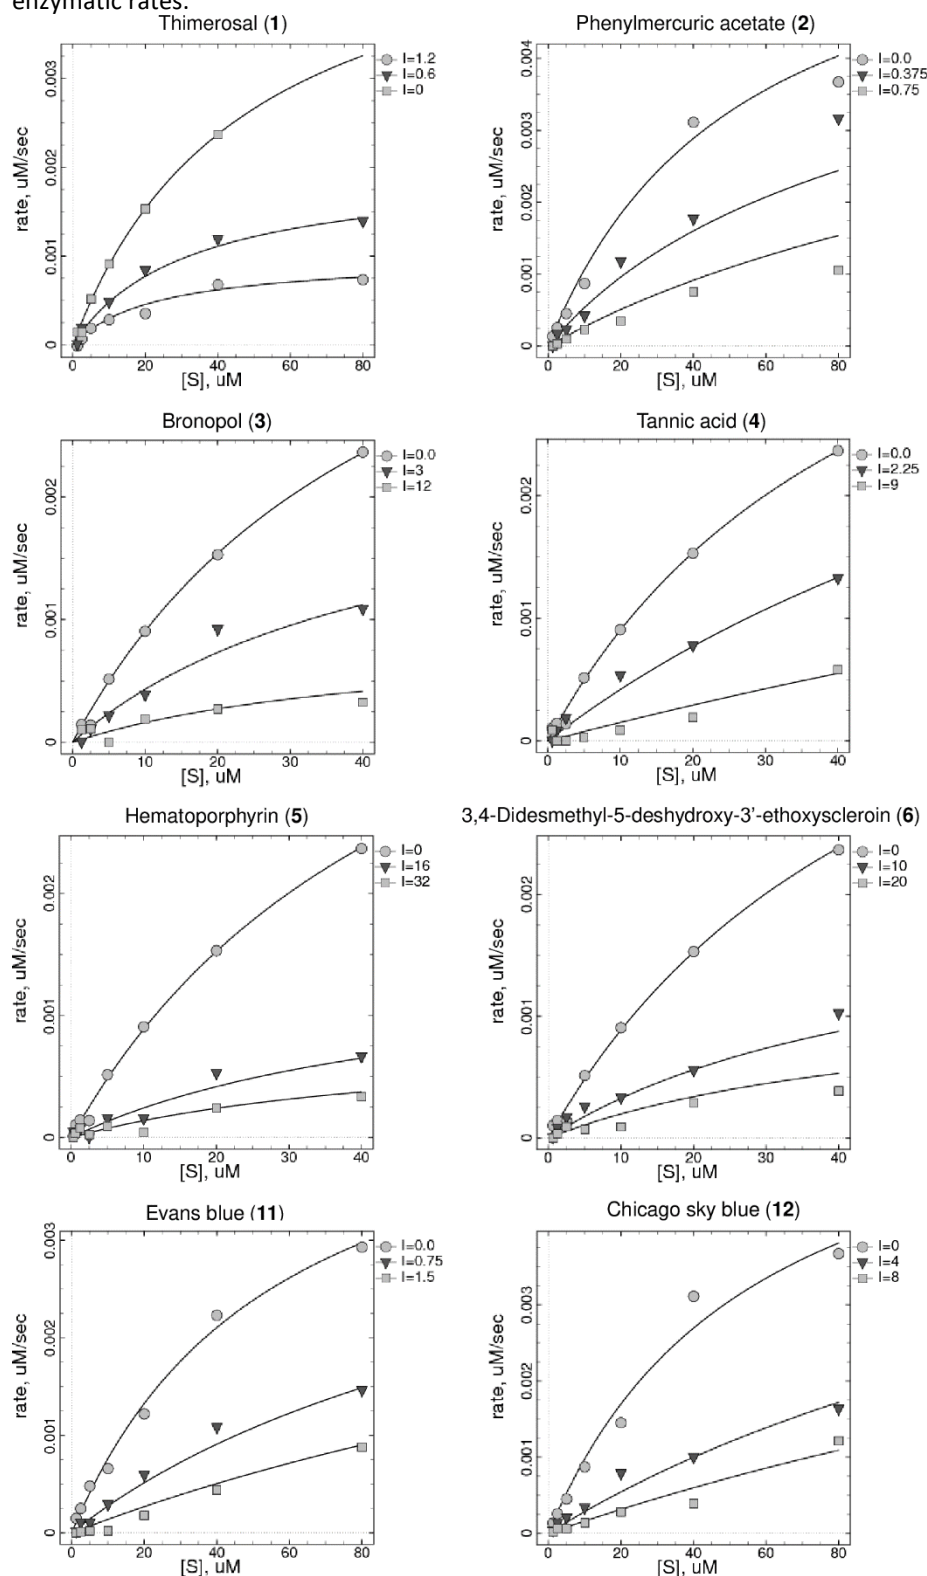

Supplement: S1 File — (PDF) [file pone.0240079.s001.pdf]
